# Supplementary material
Source: HighWire-hosted journal article supplement (https://gpsych.bmj.com/content/31/1/e100004)
Supplement: inline-supplementary-material-1 [file inline-supplementary-material-1.docx]

**配对计数结果的检验**

Proudfoot JA, Lin T, Wang B, Tu XM

**概述：**配对t检验被广泛用于比较配对连续性结果之间的差异。然而，该检验方法并不适用于非连续性结果。对于二分类结果，McNemar检验是比较配对二分类变量之间差异的实用性方法。关于计数或频率的结果，既往文献没有太多的讨论。Wilcoxon符号秩检验经常用于评估配对计数结果之间的差异。但是，Mann-Whitney U检验或Wilcoxon秩和检验是比较两个相互独立的组，而Wilcoxon符号秩检验通常是无效的（把握度）。在本文中，我们考虑了一些替代方法来比较配对计数结果，并采用蒙特卡洛模拟与Wilcoxon符号秩检验进行了对比。
